# Supplementary material for: Spectroscopic and crystallographic characterization of two cathinone derivatives: 1-(4-fluorophenyl)-2-(methylamino)pentan-1-one (4-FPD) hydrochloride and 1-(4-methylphenyl)-2-(ethylamino)pentan-1-one (4-MEAP) hydrochloride
Source: Springer Nature journal article supplement (doi:10.1007/s11419-017-0393-6), 2017-11-17
Supplement: MOESM1 [file 15233614]

**Spectroscopic and crystallographic characterization of two cathinone derivatives: 1-(4-fluorophenyl)-2-(methylamino)pentan-1-one (4-FPD) hydrochloride and 1-(4-methylphenyl)-2-(ethylamino)pentan-1-one (4-MEAP) hydrochloride**

Marcin Rojkiewicz<sup>1</sup>, Piotr Kuś, Joachim Kusz, Maria Książek

<sup>1</sup> University of Silesia, Institute of Chemistry, Department of Organic Synthesis, 9 Szkolna Street, 40-006 Katowice, Poland

E-mail address: [marcin.rojkiewicz@us.edu.pl](mailto:marcin.rojkiewicz@us.edu.pl) (M. Rojkiewicz)

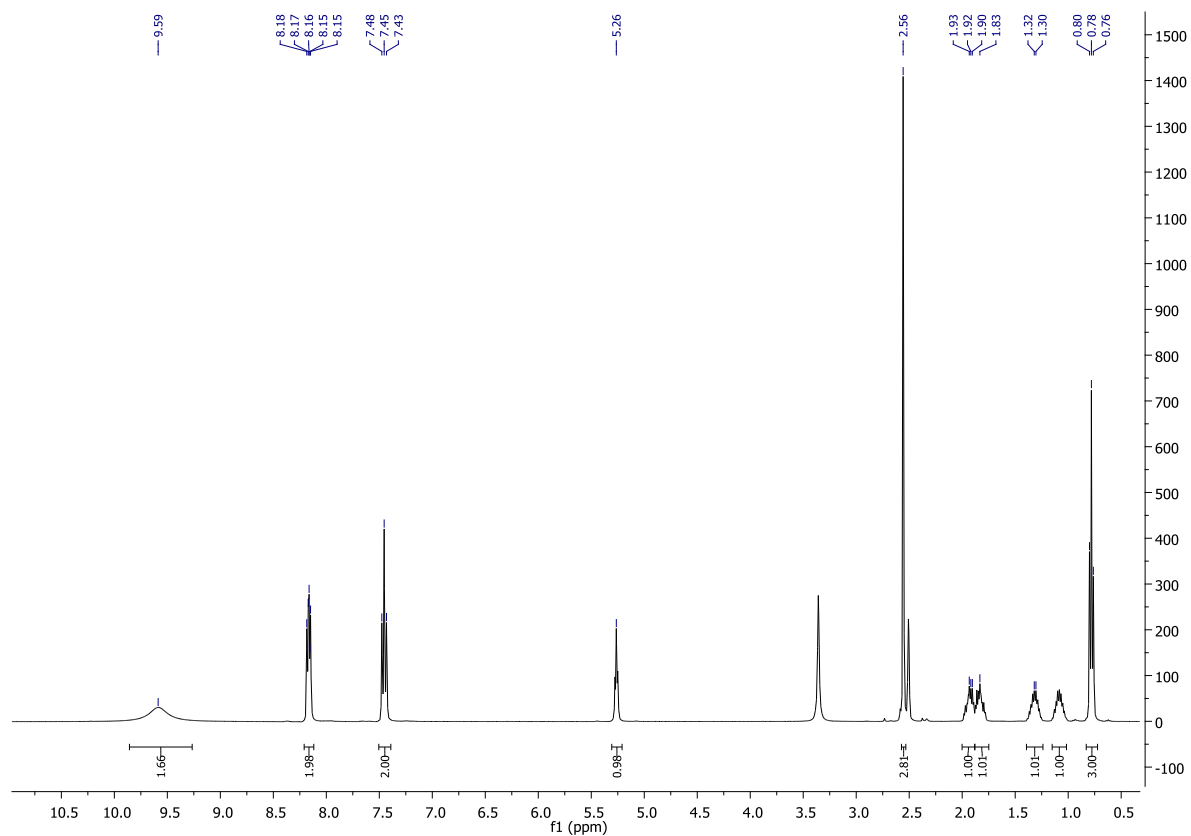

**Fig. S1** The  $^1\text{H}$  nuclear magnetic resonance spectrum for compound **1** (4-FPD)

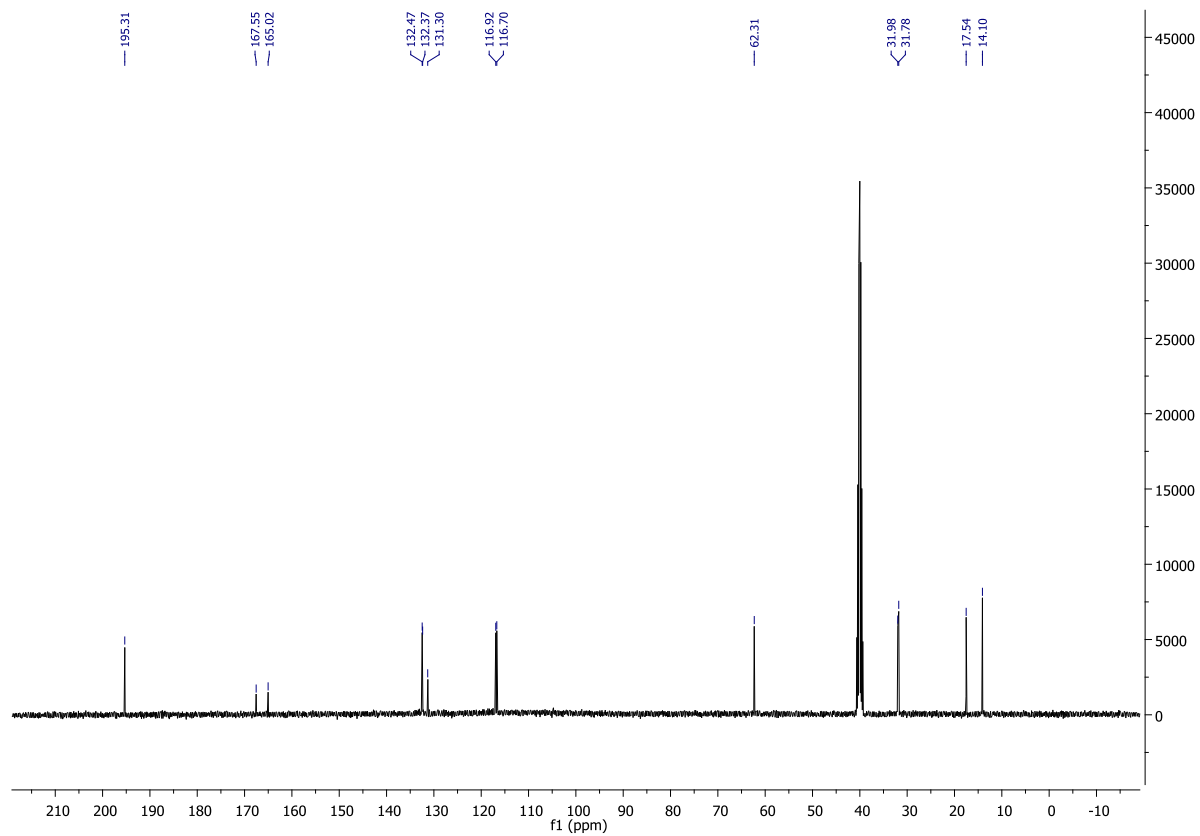

**Fig. S2** The  $^{13}\text{C}$  nuclear magnetic resonance spectrum for compound **1** (4-FPD)

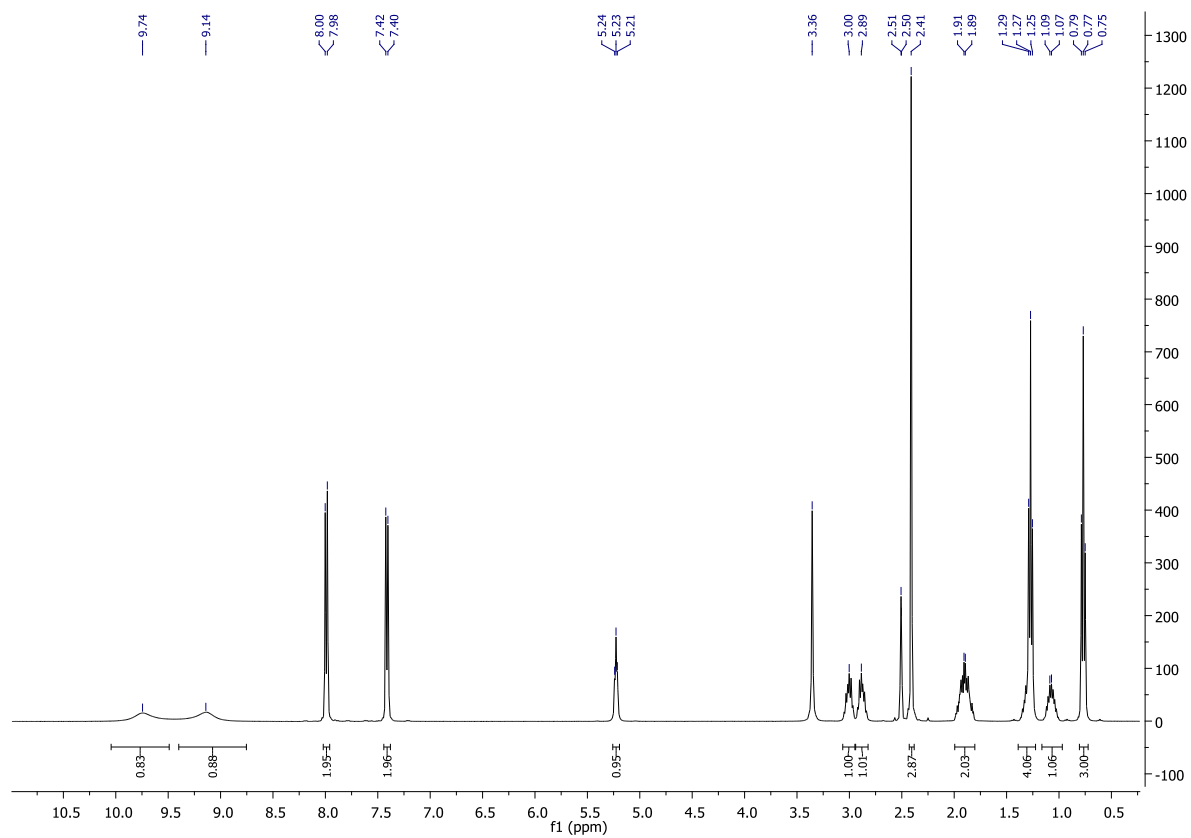

**Fig. S3** The  $^1\text{H}$  nuclear magnetic resonance spectrum for compound **2** (4-MEAP)

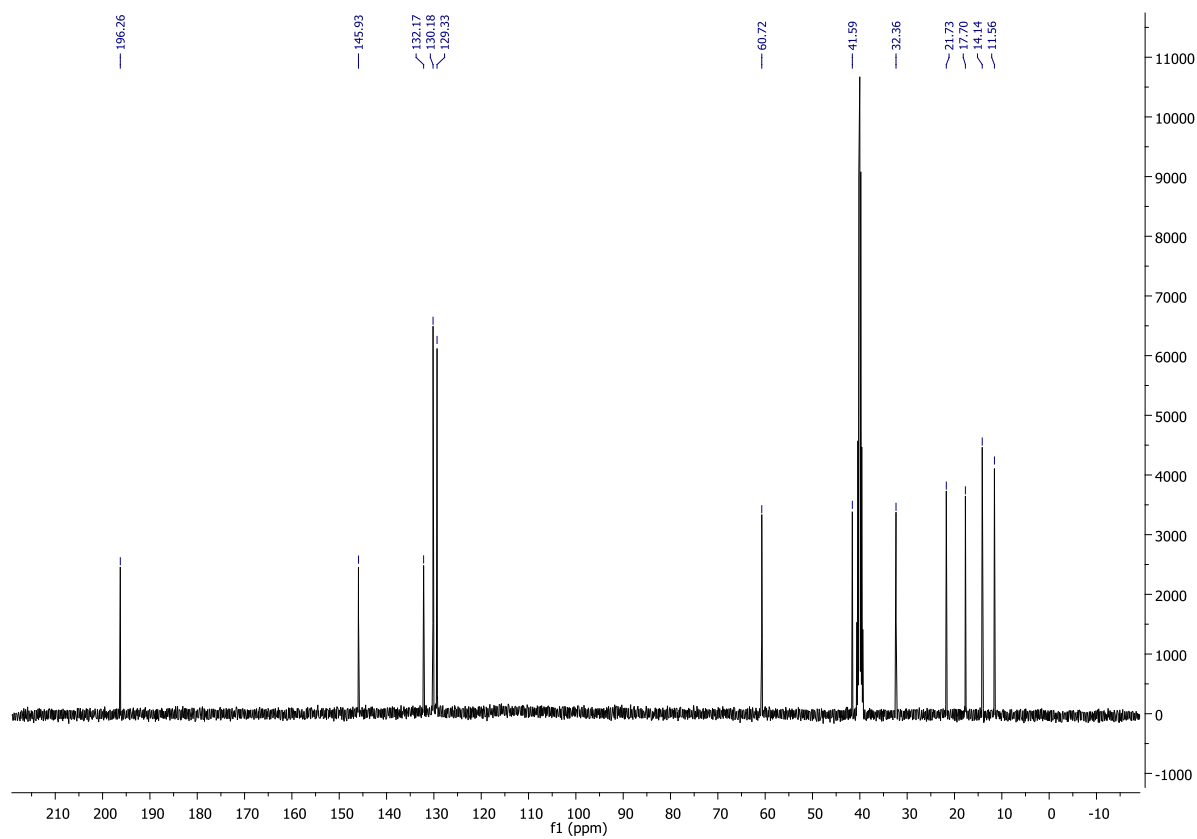

**Fig. S4** The  $^{13}\text{C}$  nuclear magnetic resonance spectrum for compound **2** (4-MEAP)

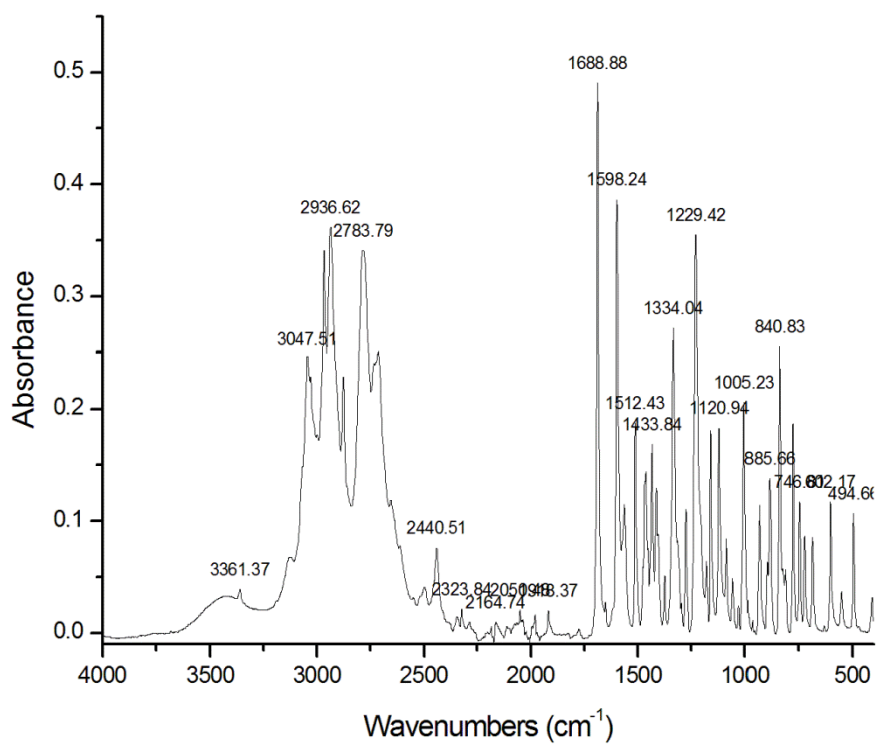

**Fig. S5** The IR spectrum for compound **1** (4-FPD)

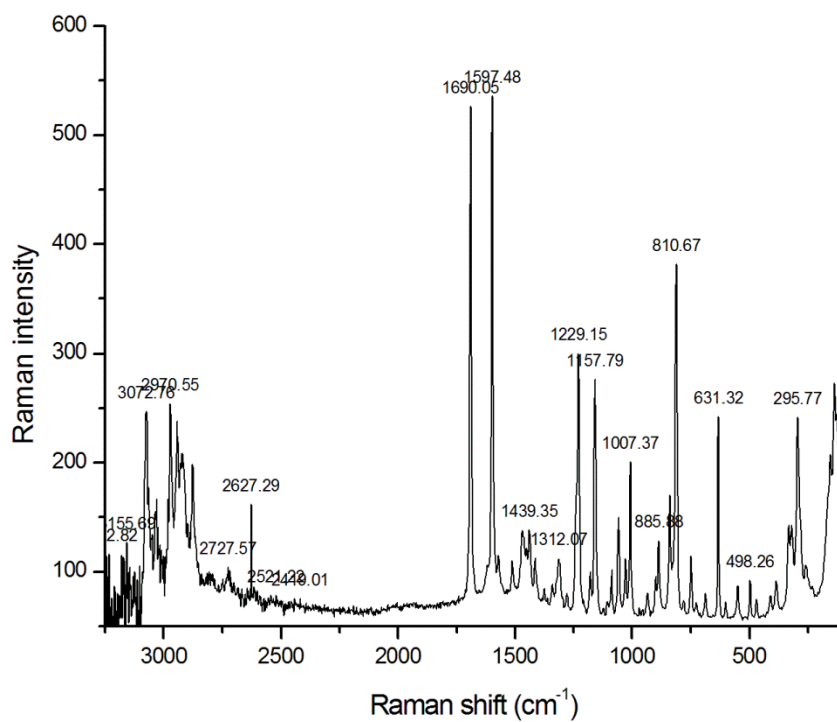

**Fig. S6** The Raman spectrum for compound **1** (4-FPD)

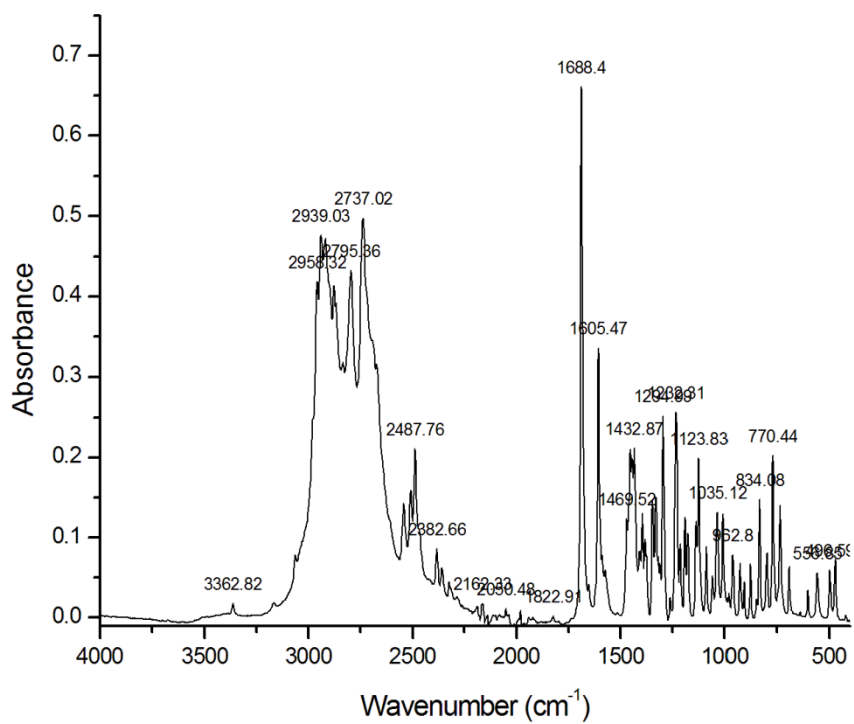

Fig. S7 The IR spectrum for compound **2** (4-MEAP)

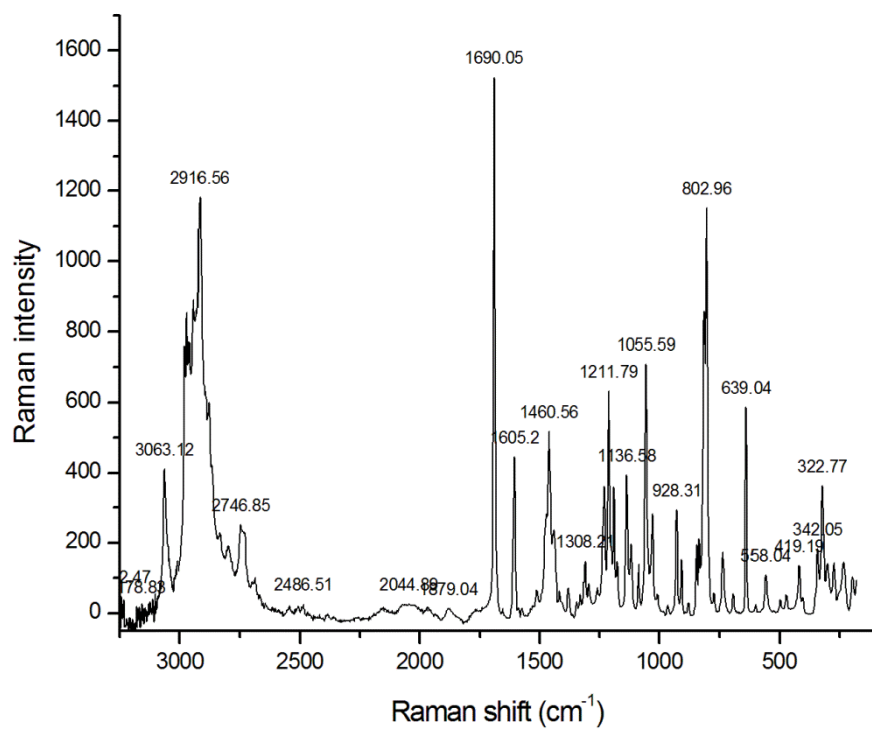

Fig. S8 The Raman spectrum for compound **2** (4-MEAP)

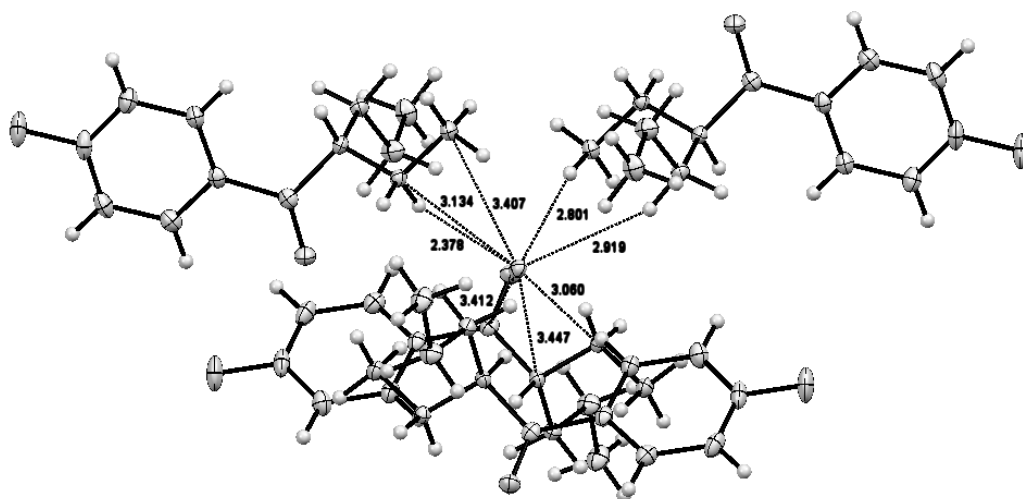

**Fig. S9** Short contacts in crystal of compound **1** (4-FPD)

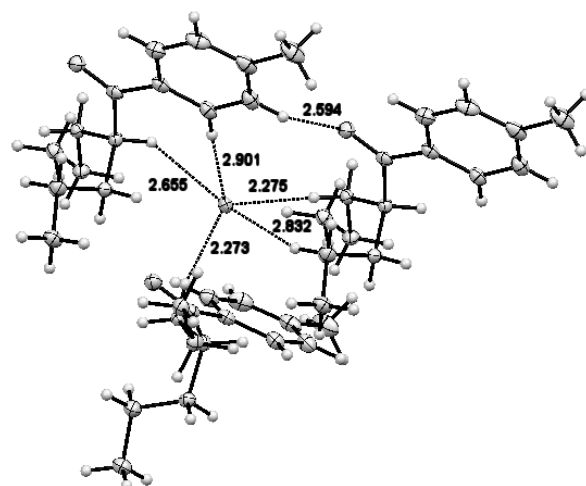

**Fig. S10** Short contacts in crystal of compound **2** (4-MEAP)
